# Supplementary material for: Preparation and characterization of Cu–rare earth/Al2O3 catalysts and their application in the electrochemical removal of p-nitrophenol
Source: Royal Society of Chemistry journal article supplement (doi:10.1039/c6ra21164j), 2016-01-01
Supplement: c6ra21164j1.pdf [file c6ra21164j1.pdf]

Electronic Supplementary Information

**Preparation and characterization of Cu-rare earth/Al<sub>2</sub>O<sub>3</sub> catalysts and their  
application for electrochemical removal of p-nitrophenol**

Xiaoyue Duan,<sup>ab</sup> Fang Ren<sup>c</sup> and Limin Chang<sup>\*c</sup>

<sup>a</sup>School of Environmental Science and Engineering, Jilin Normal University, Siping  
136000, China

<sup>b</sup>Key Laboratory of Environmental Materials and Pollution Control, The Education  
Department of Jilin Province, Siping 136000, China

<sup>c</sup>Key Laboratory of Preparation and Application of Environmental Friendly Materials,  
Ministry of Education, Jilin Normal University, Haifeng Street 1301, Tiexi District,  
Siping 136000, Jilin Province, P. R. China. E-mail: changlimin2139@163.com; Fax:  
+86-434-3292233; Tel: +86-434-3292094

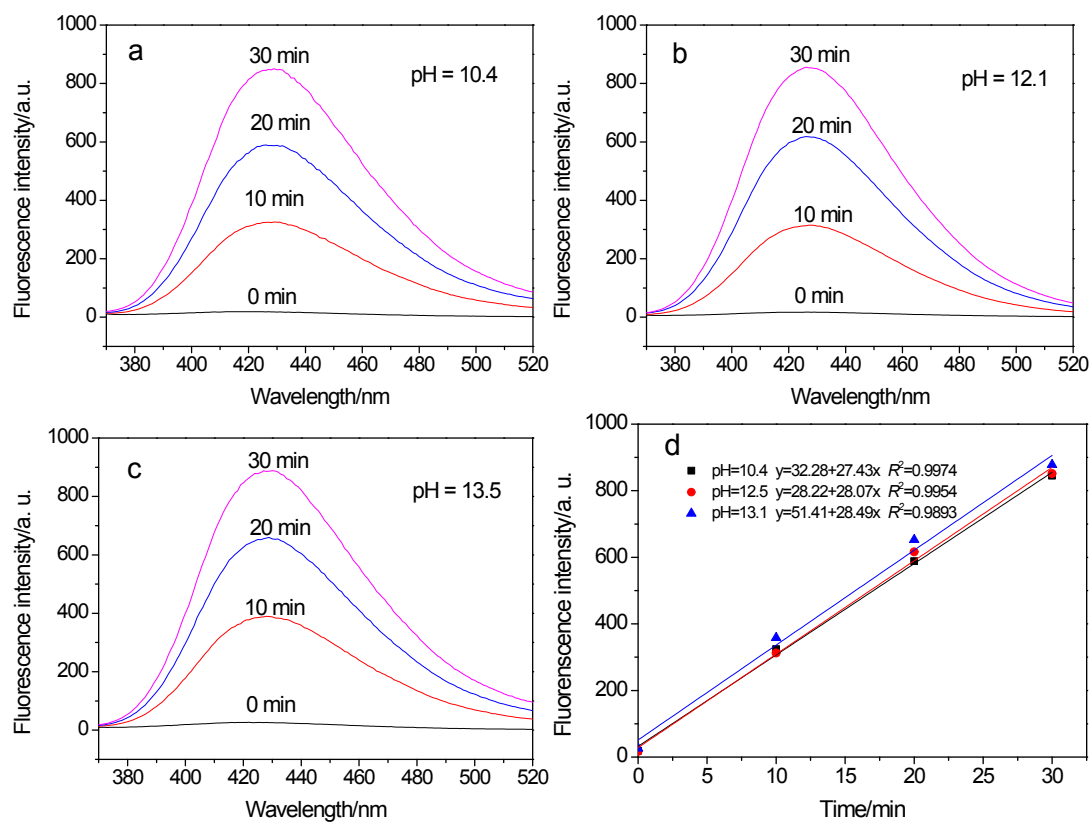

**Fig. S1** Fluorescence spectra of HA for diferent pH of 10.4 (a), 12.1 (b) and 13.5 (c), and plots of fluorescence intensity against time (d).

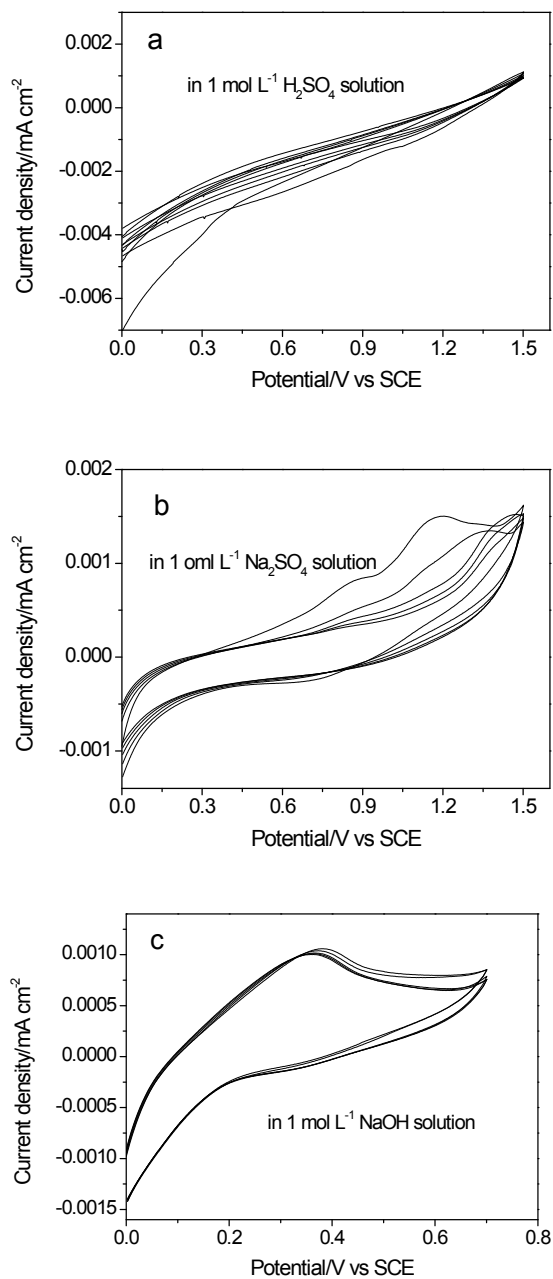

Fig. S2. Cyclic voltammograms (5 cycles) of *p*-NP in 1 mol L<sup>-1</sup> H<sub>2</sub>SO<sub>4</sub>, Na<sub>2</sub>SO<sub>4</sub>, and NaOH solutions with 500 mg L<sup>-1</sup> *p*-NP on PbO<sub>2</sub> electrode. Scan rate: 50 mV s<sup>-1</sup>.
